# Supplementary material for: Plasmonic dye-sensitized solar cells incorporated with Au–TiO2nanostructures with tailored configurations
Source: Royal Society of Chemistry journal article supplement (doi:10.1039/c3nr05012b), 2013-11-26
Supplement: c3nr05012b.pdf [file c3nr05012b.pdf]

## Supporting Information

# Plasmonic dye-sensitized solar cells incorporated with Au-TiO<sub>2</sub> Nanostructures with tailored configuration

Yoon Hee Jang,<sup>a</sup> Yu Jin Jang,<sup>a</sup> Saji Thomas Kochuveedu,<sup>a</sup> Myunghwan Byun,<sup>c</sup> Zhiqun Lin,<sup>b</sup>  
and Dong Ha Kim<sup>\*a</sup>

<sup>a</sup>Department of Chemistry, Global Top 5 Program, Ewha Womans University, 52, Ewhayeodae-gil, Seodaemun-gu, Seoul, 120-750, South Korea, <sup>b</sup>School of Material Science and Engineering, Georgia Institute of Technology, Atlanta, GA 30332, United State, <sup>c</sup>Department of Polymer Science and Engineering, University of Massachusetts, Amherst, MA 01003, United State

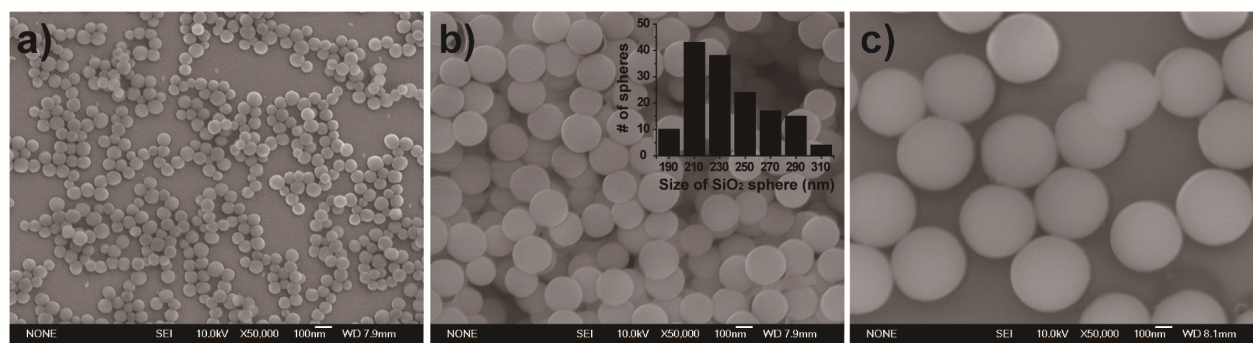

**Fig. S1** SEM image of SiO<sub>2</sub> spheres with around a) 50 nm, b) 200 nm, and c) 400 nm size synthesized by modified Stöber method. Inset graph in b) is the size distribution of SiO<sub>2</sub> spheres.

|                    | 50 nm     | 200 nm    | 400 nm    |
|--------------------|-----------|-----------|-----------|
| Ethanol            | 100 mL    | 100 mL    | 100 mL    |
| NH <sub>4</sub> OH | 0.05 mol  | 0.07 mol  | 0.16 mol  |
| H <sub>2</sub> O   | 2 mol     | 1 mol     | 1 mol     |
| TEOS               | 0.028 mol | 0.028 mol | 0.028 mol |

**Table S1** A summary of synthetic conditions of SiO<sub>2</sub> spheres with various size.

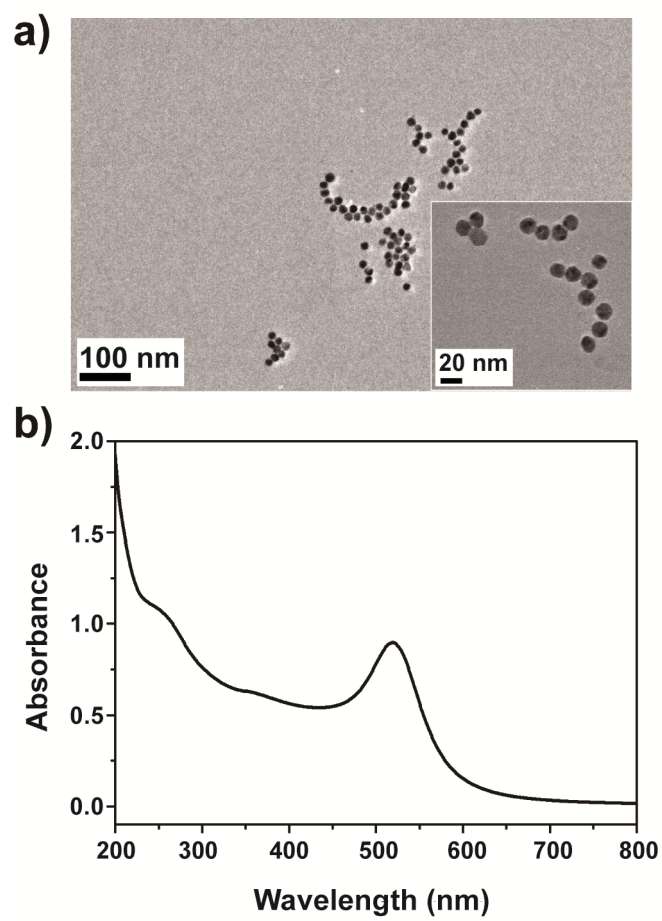

**Fig. S2** a) SEM image of citrate-stabilized AuNPs with 15 nm size and b) UV-VIS absorption spectrum.

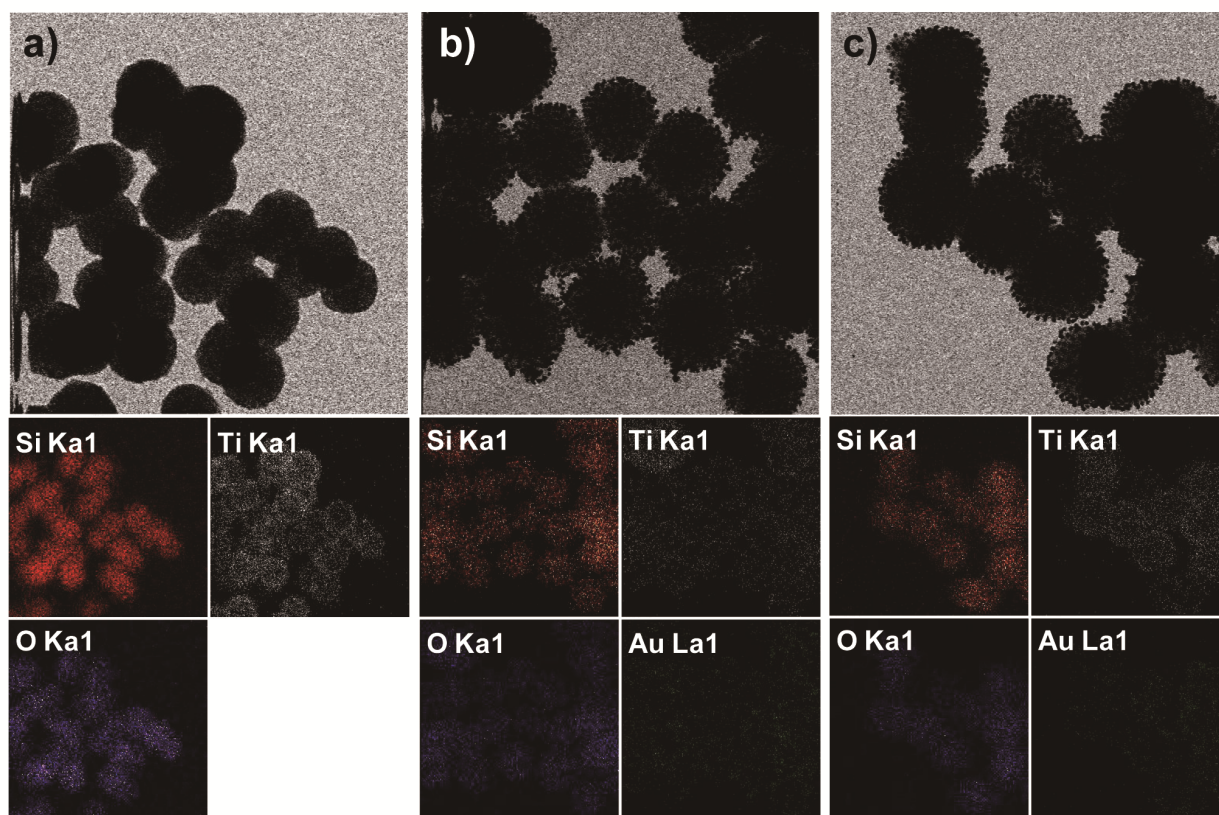

**Fig. S3** Elementary mapping of a)  $\text{SiO}_2@TiO_2$ , b)  $\text{SiO}_2@TiO_2@AuNP$ , and c)  $TiO_2@AuNP@TiO_2$  core-shell structures.

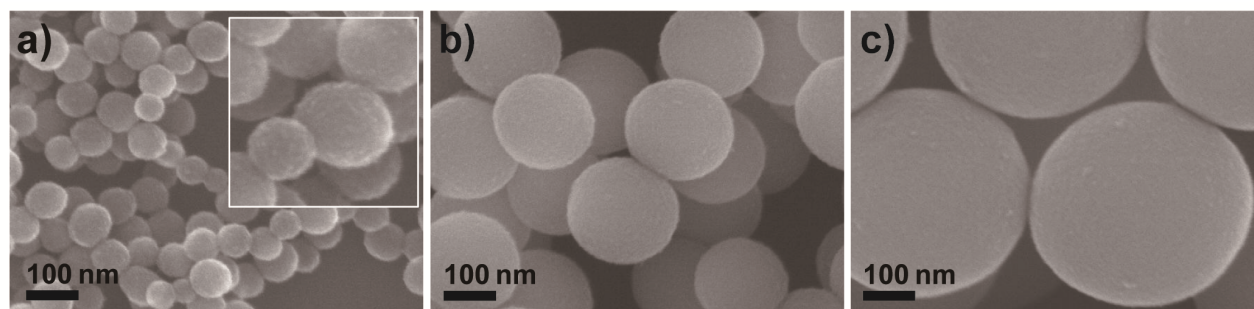

**Fig. S4** SEM images of size controlled  $\text{SiO}_2@ \text{TiO}_2$  core-shell structures: a) 50 nm, b) 200 nm, and c) 400 nm.

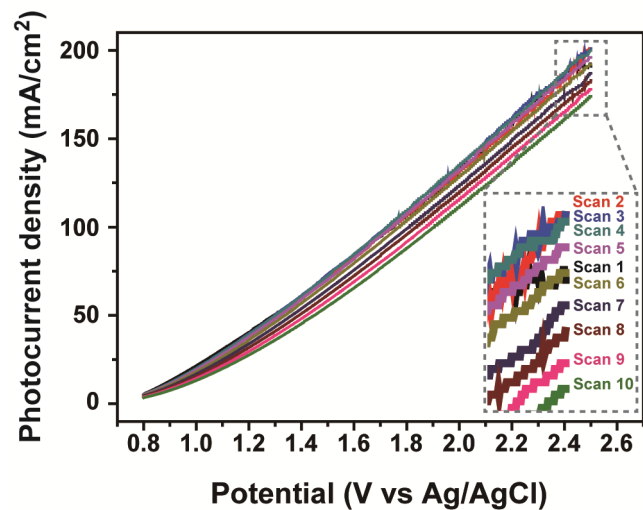

**Fig. S5** Photocurrent versus potential characteristics (linear-sweep voltammetry, LSV curves) of SiO<sub>2</sub>@TiO<sub>2</sub>@AuNP-containing TiO<sub>2</sub> films in 0.1 M NaOH electrolyte under visible light illumination.

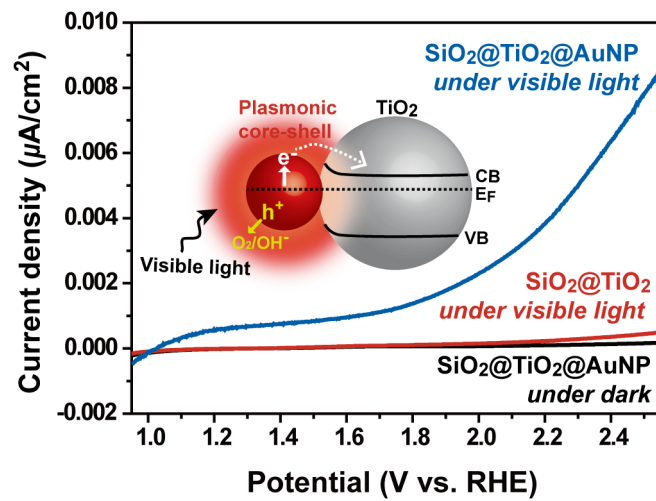

**Fig. S6** Visible light-driven photo-oxidation of  $\text{SiO}_2@\text{TiO}_2$  and  $\text{SiO}_2@\text{TiO}_2@\text{AuNP}$  core-shell structures in 0.1 M NaOH electrolyte under visible light illumination (using a cut-off filter with a wavelength of 420 nm).



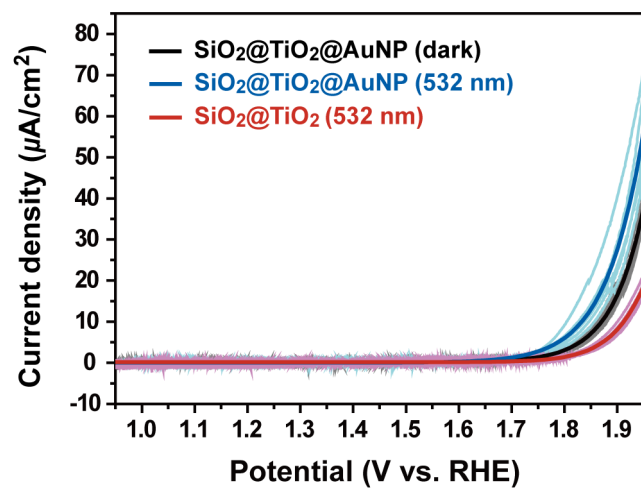

**Fig. S7** Visible light-driven oxygen evolution of  $\text{SiO}_2@\text{TiO}_2$  and  $\text{SiO}_2@\text{TiO}_2@\text{AuNP}$  core-shell structures: cyclic voltammetry (CV) in oxygen-saturated 0.1 M KOH electrolyte with 532 nm, 10 mW laser illumination.
